# Supplementary material
Source: PubMed Central journal article supplement (PMC3945836)
Supplement: pro0023-0284-sd1.pdf [file pro0023-0284-sd1.pdf]

# Signatures of $n \rightarrow \pi^*$ interactions in proteins

Robert W. Newberry, Gail J. Bartlett, Brett VanVeller,

Derek N. Woolfson\*, and Ronald T. Raines\*

| Page  | Contents                                                                                                     |
|-------|--------------------------------------------------------------------------------------------------------------|
| S1    | Table of Contents                                                                                            |
| S1    | <b>Figure S1.</b> Parameters governing optimization of formamide as approached by formaldehyde ( <b>1</b> ). |
| S1–S3 | <b>Tables S1–S16.</b> Cartesian coordinates of <b>1</b> optimized at various values of $d$ .                 |
| S3    | <b>Table S17.</b> Energies of <b>1</b> optimized at various values of $d$ .                                  |

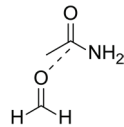

| Parameter                                                                                        | Value     |
|--------------------------------------------------------------------------------------------------|-----------|
| O <sub>aldehyde</sub> –C <sub>amide</sub> distance ( $d$ )                                       | 2.5–3.5 Å |
| O <sub>aldehyde</sub> –C <sub>amide</sub> –O <sub>amide</sub> angle                              | 110°      |
| C <sub>aldehyde</sub> –O <sub>aldehyde</sub> –C <sub>amide</sub> –O <sub>amide</sub> dihedral    | 180°      |
| H <sub>aldehyde</sub> –C <sub>aldehyde</sub> –O <sub>aldehyde</sub> –C <sub>amide</sub> dihedral | 180°      |

**Figure S1.** Optimization parameters of formamide as approached by formaldehyde (**1**).

| Table S1. Cartesian coordinates of <b>1</b> at $d = 2.75$ Å |             |             |             | Table S2. Cartesian coordinates of <b>1</b> at $d = 2.80$ Å |             |             |             |
|-------------------------------------------------------------|-------------|-------------|-------------|-------------------------------------------------------------|-------------|-------------|-------------|
| C                                                           | 2.21955600  | 0.13416200  | 0.12859200  | C                                                           | 2.24354900  | 0.13741800  | 0.13139500  |
| O                                                           | 1.46735700  | -0.70820000 | -0.27323400 | O                                                           | 1.49615000  | -0.70793200 | -0.27340800 |
| H                                                           | 3.31315700  | 0.06878400  | -0.02535400 | H                                                           | 3.33797500  | 0.07643000  | -0.01847800 |
| H                                                           | 1.86483300  | 1.02939700  | 0.67981700  | H                                                           | 1.88243600  | 1.03092800  | 0.68131200  |
| C                                                           | -1.12407700 | -0.05808800 | 0.37817000  | C                                                           | -1.14749300 | -0.05652500 | 0.37991000  |
| N                                                           | -0.89655000 | 1.16483000  | -0.18088700 | N                                                           | -0.90929300 | 1.16184800  | -0.18381700 |
| H                                                           | -0.68059200 | -0.16989000 | 1.38216400  | H                                                           | -0.70718100 | -0.16613100 | 1.38568000  |
| H                                                           | -1.23029300 | 1.32754000  | -1.11901700 | H                                                           | -1.23337100 | 1.32152200  | -1.12587000 |
| H                                                           | -0.21152900 | 1.79416100  | 0.20047400  | H                                                           | -0.22213300 | 1.78762700  | 0.19970700  |
| O                                                           | -1.88643200 | -0.87433000 | -0.08832300 | O                                                           | -1.90477700 | -0.87565100 | -0.08952500 |
| Table S3. Cartesian coordinates of <b>1</b> at $d = 2.85$ Å |             |             |             | Table S4. Cartesian coordinates of <b>1</b> at $d = 2.90$ Å |             |             |             |
| C                                                           | 2.26746800  | 0.14030900  | 0.13392600  | C                                                           | 2.29195500  | 0.14384600  | 0.13652700  |
| O                                                           | 1.52494500  | -0.70758700 | -0.27352900 | O                                                           | 1.55407200  | -0.70713100 | -0.27354600 |
| H                                                           | 3.36314500  | 0.08434200  | -0.01108400 | H                                                           | 3.38821500  | 0.09167500  | -0.00495400 |
| H                                                           | 1.90117000  | 1.03317900  | 0.68296300  | H                                                           | 1.92011500  | 1.03498900  | 0.68391500  |
| C                                                           | -1.17079300 | -0.05470600 | 0.38163700  | C                                                           | -1.19389700 | -0.05337200 | 0.38316000  |
| N                                                           | -0.92187900 | 1.15855300  | -0.18669100 | N                                                           | -0.93597200 | 1.15574500  | -0.18933700 |
| H                                                           | -0.73377200 | -0.16324500 | 1.38924400  | H                                                           | -0.75990500 | -0.15947100 | 1.39241400  |
| H                                                           | -1.23712600 | 1.31432200  | -1.13245000 | H                                                           | -1.24114700 | 1.30741800  | -1.13910600 |
| H                                                           | -0.23328800 | 1.78223700  | 0.19808500  | H                                                           | -0.24464700 | 1.77559600  | 0.19661600  |
| O                                                           | -1.92332300 | -0.87670300 | -0.09063300 | O                                                           | -1.94146900 | -0.87827800 | -0.09165900 |

|                                                                               |                                                                               |
|-------------------------------------------------------------------------------|-------------------------------------------------------------------------------|
| <b>Table S5.</b> Cartesian coordinates of <b>1</b> at $d = 2.95 \text{ \AA}$  | <b>Table S6.</b> Cartesian coordinates of <b>1</b> at $d = 3.00 \text{ \AA}$  |
| C 2.31651600 0.14736500 0.13890600                                            | C 2.34130300 0.15095100 0.14113000                                            |
| O 1.58330700 -0.70669200 -0.27341300                                          | O 1.61274100 -0.70616500 -0.27322100                                          |
| H 3.41343200 0.09908700 0.00113000                                            | H 3.43888300 0.10668800 0.00708000                                            |
| H 1.93903200 1.03710700 0.68448100                                            | H 1.95830900 1.03943900 0.68485300                                            |
| C -1.21691800 -0.05212700 0.38445000                                          | C -1.23973600 -0.05099000 0.38565900                                          |
| N -0.95003600 1.15295000 -0.19204000                                          | N -0.96469400 1.15018100 -0.19466600                                          |
| H -0.78593900 -0.15582100 1.39544700                                          | H -0.81170100 -0.15219400 1.39832900                                          |
| H -1.24634600 1.30120300 -1.14516400                                          | H -1.25240500 1.29476900 -1.15100000                                          |
| H -0.25751000 1.77010900 0.19620400                                           | H -0.27125500 1.76506200 0.19569200                                           |
| O -1.95955900 -0.88002900 -0.09258200                                         | O -1.97753700 -0.88193500 -0.09340700                                         |
| <b>Table S7.</b> Cartesian coordinates of <b>1</b> at $d = 3.05 \text{ \AA}$  | <b>Table S8.</b> Cartesian coordinates of <b>1</b> at $d = 3.10 \text{ \AA}$  |
| C 2.36635400 0.15466200 0.14320700                                            | C 2.39167000 0.15850100 0.14514500                                            |
| O 1.64241400 -0.70552900 -0.27299100                                          | O 1.67232700 -0.70479100 -0.27272900                                          |
| H 3.46457100 0.11443200 0.01281200                                            | H 3.49048200 0.12227900 0.01829500                                            |
| H 1.97796900 1.04196200 0.68501500                                            | H 1.99798100 1.04464000 0.68496800                                            |
| C -1.26232700 -0.05003200 0.38678500                                          | C -1.28469300 -0.04927300 0.38782300                                          |
| N -0.98003100 1.14746000 -0.19719500                                          | N -0.99604200 1.14481800 -0.19961500                                          |
| H -0.83715800 -0.14864700 1.40106400                                          | H -0.86231400 -0.14519900 1.40365200                                          |
| H -1.25982300 1.28836600 -1.15644400                                          | H -1.26866300 1.28210100 -1.16147200                                          |
| H -0.28610300 1.76065500 0.19505500                                           | H -0.30202200 1.75689800 0.19431700                                           |
| O -1.99533900 -0.88406800 -0.09414500                                         | O -2.01295500 -0.88643500 -0.09480400                                         |
| <b>Table S9.</b> Cartesian coordinates of <b>1</b> at $d = 3.15 \text{ \AA}$  | <b>Table S10.</b> Cartesian coordinates of <b>1</b> at $d = 3.20 \text{ \AA}$ |
| C 2.41722800 0.16243100 0.14695600                                            | C 2.44300400 0.16641800 0.14865100                                            |
| O 1.70244400 -0.70396800 -0.27244200                                          | O 1.73273100 -0.70308100 -0.27212900                                          |
| H 3.51659000 0.13018000 0.02354100                                            | H 3.54287500 0.13809000 0.02856700                                            |
| H 2.01831900 1.04743000 0.68474000                                            | H 2.03896600 1.05030300 0.68434400                                            |
| C -1.30685800 -0.04869400 0.38878100                                          | C -1.32884700 -0.04827100 0.38965800                                          |
| N -1.01267200 1.14228000 -0.20191800                                          | N -1.02983500 1.13985400 -0.20410900                                          |
| H -0.88719800 -0.14185100 1.40610200                                          | H -0.91184200 -0.13860600 1.40842100                                          |
| H -1.27869200 1.27595900 -1.16615100                                          | H -1.28970600 1.26996000 -1.17052900                                          |
| H -0.31877200 1.75363300 0.19346400                                           | H -0.33620400 1.75076200 0.19254500                                           |
| O -2.03041500 -0.88899800 -0.09539500                                         | O -2.04775500 -0.89171600 -0.09592500                                         |
| <b>Table S11.</b> Cartesian coordinates of <b>1</b> at $d = 3.25 \text{ \AA}$ | <b>Table S12.</b> Cartesian coordinates of <b>1</b> at $d = 3.30 \text{ \AA}$ |
| C 2.46898000 0.17044000 0.15023500                                            | C 2.49525800 0.17462600 0.15166200                                            |
| O 1.76316200 -0.70214400 -0.27179100                                          | O 1.79390400 -0.70110500 -0.27141700                                          |
| H 3.56932200 0.14598200 0.03338400                                            | H 3.59603600 0.15406900 0.03791900                                            |
| H 2.05991000 1.05324000 0.68379100                                            | H 2.08120000 1.05637100 0.68297400                                            |
| C -1.35067900 -0.04798400 0.39045400                                          | C -1.37223200 -0.04796300 0.39114200                                          |
| N -1.04746500 1.13753900 -0.20619300                                          | N -1.06588600 1.13531100 -0.20818800                                          |
| H -0.93627200 -0.13546500 1.41061200                                          | H -0.96035000 -0.13241500 1.41266500                                          |
| H -1.30157800 1.26413400 -1.17463100                                          | H -1.31523000 1.25874800 -1.17828700                                          |
| H -0.35423400 1.74823100 0.19160800                                           | H -0.37412800 1.74685600 0.19094000                                           |
| O -2.06500000 -0.89455900 -0.09640100                                         | O -2.08196400 -0.89774300 -0.09679800                                         |

| <b>Table S13.</b> Cartesian coordinates of <b>1</b> at $d = 3.35 \text{ \AA}$ |             |             |             | <b>Table S14.</b> Cartesian coordinates of <b>1</b> at $d = 3.40 \text{ \AA}$ |             |             |             |
|-------------------------------------------------------------------------------|-------------|-------------|-------------|-------------------------------------------------------------------------------|-------------|-------------|-------------|
| C                                                                             | 2.52177300  | 0.17881300  | 0.15300300  | C                                                                             | 2.54836000  | 0.18302700  | 0.15418300  |
| O                                                                             | 1.82478600  | -0.69997800 | -0.27112200 | O                                                                             | 1.85576600  | -0.69894600 | -0.27058600 |
| H                                                                             | 3.62294100  | 0.16205500  | 0.04218700  | H                                                                             | 3.64990800  | 0.17005200  | 0.04643500  |
| H                                                                             | 2.10302300  | 1.05956000  | 0.68223200  | H                                                                             | 2.12460600  | 1.06283700  | 0.68087600  |
| C                                                                             | -1.39359200 | -0.04808200 | 0.39188000  | C                                                                             | -1.41490600 | -0.04829000 | 0.39224700  |
| N                                                                             | -1.08442600 | 1.13292300  | -0.21017600 | N                                                                             | -1.10388300 | 1.13119600  | -0.21187800 |
| H                                                                             | -0.98422100 | -0.12974800 | 1.41456500  | H                                                                             | -1.00798200 | -0.12678900 | 1.41636900  |
| H                                                                             | -1.33154000 | 1.25435700  | -1.18109900 | H                                                                             | -1.34495400 | 1.24903200  | -1.18479100 |
| H                                                                             | -0.39556700 | 1.74691000  | 0.19031200  | H                                                                             | -0.41594100 | 1.74538300  | 0.19005300  |
| O                                                                             | -2.09887800 | -0.90101900 | -0.09716000 | O                                                                             | -2.11566300 | -0.90446800 | -0.09746200 |
| <b>Table S15.</b> Cartesian coordinates of <b>1</b> at $d = 3.45 \text{ \AA}$ |             |             |             | <b>Table S16.</b> Cartesian coordinates of <b>1</b> at $d = 3.50 \text{ \AA}$ |             |             |             |
| C                                                                             | 2.57520300  | 0.18724500  | 0.15530800  | C                                                                             | 2.60220200  | 0.19143700  | 0.15635100  |
| O                                                                             | 1.88689300  | -0.69778800 | -0.27017100 | O                                                                             | 1.91808100  | -0.69661500 | -0.26975500 |
| H                                                                             | 3.67708200  | 0.17800500  | 0.05036100  | H                                                                             | 3.70439800  | 0.18580800  | 0.05418000  |
| H                                                                             | 2.14684400  | 1.06611200  | 0.67969200  | H                                                                             | 2.16931200  | 1.06935700  | 0.67840600  |
| C                                                                             | -1.43600500 | -0.04865300 | 0.39275200  | C                                                                             | -1.45700000 | -0.04906300 | 0.39319700  |
| N                                                                             | -1.12331800 | 1.12909400  | -0.21370000 | N                                                                             | -1.14292800 | 1.12699300  | -0.21543200 |
| H                                                                             | -1.03146500 | -0.12404500 | 1.41803600  | H                                                                             | -1.05479700 | -0.12155700 | 1.41969300  |
| H                                                                             | -1.36167000 | 1.24481300  | -1.18751600 | H                                                                             | -1.37911700 | 1.24084500  | -1.18998700 |
| H                                                                             | -0.43887300 | 1.74602900  | 0.19002800  | H                                                                             | -0.46247700 | 1.74719500  | 0.18995600  |
| O                                                                             | -2.13237800 | -0.90797800 | -0.09771000 | O                                                                             | -2.14908600 | -0.91149100 | -0.09793300 |

**Table S17.** Energies of **1** optimized at various values of  $d$ .

| $d (\text{\AA})$ | Energy (Hartree) |
|------------------|------------------|
| 2.75             | -284.4950067740  |
| 2.80             | -284.4957078650  |
| 2.85             | -284.4963193460  |
| 2.90             | -284.4968531970  |
| 2.95             | -284.4973185180  |
| 3.00             | -284.4977250820  |
| 3.05             | -284.4980812470  |
| 3.10             | -284.4983937100  |
| 3.15             | -284.4986676930  |
| 3.20             | -284.4989073750  |
| 3.25             | -284.4991165440  |
| 3.30             | -284.4992991080  |
| 3.35             | -284.4994588180  |
| 3.40             | -284.4995995940  |
| 3.45             | -284.4997246160  |
| 3.50             | -284.4998364470  |
